# Supplementary material for: Serine/Threonine Kinase 17A Is a Novel Candidate for Therapeutic Targeting in Glioblastoma
Source: PLoS One. 2013 Nov 28;8(11):e81803. doi: 10.1371/journal.pone.0081803 (PMC3842963; doi:10.1371/journal.pone.0081803)
Supplement: Table S1 — Combined files tables (A-H) of Cox proportional analyses for all glioma, low grade glioma and glioblastoma. Table A, Univariant Cox proportional analysis for all glioma overall survival (TCGA). Table B, Multivariant Cox proportional analysis for all glioma overall survival (TCGA). Table C, Univariant Cox proportional analysis for low grade glioma overall survival (TCGA). Table D, Multivariant Cox proportional analysis for low grade glioma overall survival (TCGA). Table E, Univariant Cox proportional analysis for glioblastoma overall survival (TCGA). Table F, Multivariant Cox proportional analysis for glioblastoma overall survival (TCGA). Table G, Univariant Cox proportional analysis with genetic alterations for low grade glioma overall survival (TCGA). Table H, Multivariant Cox proportional analysis with genetic alterations for low grade glioma overall survival (TCGA). (XLSX) [file pone.0081803.s010.xlsx]

## Sheet: Sheet1
Table A. Univariant Cox proportional hazards analysis for all glioma overall survival (TCGA)
Variable	HR	CI(95%)	p-value
STK17A	2.07	1.75-2.45	5.48e-07
EGFR	1.07	0.97-1.17	0.17
Grade	4.49	3.29-6.10	8.23e-07
Gender	1.05	0.76-1.45	0.76
Age	1.07	1.05-1.08	8.15e-07
n = 366
STK17A and EGFR were log 2 normalized RNA-seq data and were treated as continuous variables.
Grade was treated as a continuous variable, Grade II (94), Grade III (112) and Grade IV (160).
For gender male (221) was the variable and female the reference.
Age was treated as a continuous variable.

## Sheet: Sheet2
Table B. Multivariant Cox proportional analysis for all glioma overall survival (TCGA)
Variable	Covariable	HR	CI(95%)	p-value
STK17A	Grade	1.26	1.02-1.54	0.029
STK17A	Age	1.62	1.35-1.94	4.15e-07
STK17A	EGFR	2.06	1.74-2.45	6.33e-07
STK17A	Gender	2.07	1.75-2.46	1.04e-06
n = 366
STK17A and EGFR were log 2 normalized RNA-seq data and were treated as continuous variables.
Grade was treated as a continuous variable, Grade II (94), Grade III (112) and Grade IV (160).
For gender male (221) was the variable and female the reference.
Age was treated as a continuous variable.

## Sheet: Sheet3
Table C. Univariant Cox proportional hazards analysis for low grade glioma overall survival (TCGA)
Variable	HR	CI(95%)	p-value
STK17A	2.29	1.39-3.75	0.0011
EGFR	1.32	1.06-1.64	0.012
Grade	2.82	1.53-5.19	0.000852
Gender	1.02	0.58-1.79	0.94
Age	1.07	1.05-1.10	2.94e-07
n = 206
STK17A and EGFR were log 2 normalized RNA-seq data and were treated as continuous variables.
Grade II (94) was treated as the reference and Grade III the variable.
For gender male (117)was the variable and female the reference.
Age was treated as a continuous variable.

## Sheet: Sheet4
Table D. Multivariant Cox proportional analysis for low grade glioma overall survival (TCGA)
Variable	Covariable	HR	CI(95%)	p-value
STK17A	Grade	1.87	1.14-3.07	0.013
STK17A	Age	2.12	1.35-3.35	0.0011
STK17A	EGFR	2.48	1.45-4.23	0.000874
STK17A	Gender	2.29	1.39-3.76	0.00112
n = 206
STK17A and EGFR were log 2 normalized RNA-seq data and were treated as continuous variables.
Grade II (94) was treated as the reference and Grade III the variable.
For gender male (117) was the variable and female the reference.
Age was treated as a continuous variable.

## Sheet: Sheet5
Table E. Univariant Cox proportional hazards analysis for glioblastoma overall survival (TCGA)
Variable	HR	CI(95%)	p-value
STK17A	1.16	1.03-1.31	0.0142
EGFR	1.03	0.97-1.10	0.27
Gender	1.13	0.92-1.40	0.24
Mol. Phenotype	0.93	0.85-1.02	0.107
Age	1.07	1.03-1.05	6.84e-07
Subset of tumors where molecular phenotype was available (n = 478).
Molecular phenotype was treated as a continuous variable = 1, classical (131), 2, mesenchymal (142), 3, neuronal (80), 4, proneuronal (125).
For gender male (287) was the variable and female the reference.
STK17A and EGFR were level 3, U133A data treated as continuous variables.
Age was treated as a continuous variable.

## Sheet: Sheet6
Table F. Multivariant Cox proportional analysis for glioblastoma overall survival (TCGA)
Variable	Covariable	HR	CI(95%)	p-value
STK17A	Age	1.08	0.96-1.22	0.21
STK17A	EGFR	1.15	1.02-1.30	0.022
STK17A	Gender	1.17	1.04-1.32	0.011
STK17A	Mol. Phenotype	1.14	1.00-1.29	0.042
Subset of tumors where molecular phenotype was available (n = 478).
Molecular phenotype was treated as a continuous variable = 1, classical (131), 2, mesenchymal (142), 3, neuronal (80), 4, proneuronal (125).
For gender male (287) was the variable and female the reference.
STK17A and EGFR were level 3, U133A data treated as continuous variables.

## Sheet: Sheet7
Table G. Univariant Cox proportional hazards analysis with genetic alterations for low grade glioma II, III overall survival (TCGA)
Variable	Reference	HR	CI(95%)	p-value
STK17A	*	2.34	1.38-3.99	0.0018
IDH1 Mut	IDH wt	0.28	0.15-0.52	4.95e-05
p53 Mut	p53 wt	0.61	0.34-1.09	0.097
CDKN2A loss	CDKN2A non-loss	3.03	1.52-6.02	0.0015
p53 path dereg	p53 path intact	2.06	1.02-4.17	0.044
EGFR Gain	EGFR non-gain	2	1.02-3.89	0.041
PTEN loss	PTEN intact	3.59	1.75-7.36	0.000457
Subset of tumors where mutational status was available (n = 165).
STK17A was treated as a continuous variable.
CDKN2A homol del are tumors with CDKN2A homologous deletion, mutation or downregulation.
p53 pathway deregulation are tumors with either CDKN2A loss, p53 mutation or MDM2/MDM4 amplification or upregulation.
EGFR gain are tumors with a EGFR amplification, mutation or upregulation.
PTEN loss are tumors with PTEN mutation, homologous deletion or downregulation.
Up or down regulation is defined as expression with z score >2 or < 2 as identified by the Cbio portal.

## Sheet: Sheet8
Table H. Multivariant Cox proportional hazards analysis with genetic alterations for low grade glioma II, III overall survival (TCGA)
Variable	Covariable	HR	CI(95%)	p-value
STK17A	IDH1 Mut	1.69	1.02-2.78	0.041
STK17A	p53 Mut	2.33	1.37-3.96	0.0017
STK17A	CDKN2A loss	1.82	1.02-3.23	0.041
STK17A	p53 path dereg	2.18	1.28-3.68	0.0038
STK17A	EGFR gain	2.12	1.22-3.68	0.007
STK17A	PTEN loss	1.78	0.99-3.17	0.054
Subset of tumors where mutational status was available (n = 165).
STK17A was treated as a continuous variable.
CDKN2A homol del are tumors with CDKN2A homologous deletion, mutation or downregulation.
p53 pathway deregulation are tumors with either CDKN2A loss, p53 mutation or MDM2/MDM4 amplification or upregulation.
EGFR gain are tumors with a EGFR amplification, mutation or upregulation.
PTEN loss are tumors with PTEN mutation, homologous deletion or downregulation.
Up or down regulation is defined as expression with z score >2 or < 2 as identified by the Cbio portal.
